# Supplementary material
Source: PubMed Central journal article supplement (PMC8243260)
Supplement: mmc1.pdf [file mmc1.pdf]

**Med, Volume 2**

**Supplemental information**

**Alterations in T and B cell function persist  
in convalescent COVID-19 patients**

**Halima A. Shuwa, Tovah N. Shaw, Sean B. Knight, Kelly Wemyss, Flora A. McClure, Laurence Pearmain, Ian Prise, Christopher Jagger, David J. Morgan, Saba Khan, Oliver Brand, Elizabeth R. Mann, Andrew Ustianowski, Nawar Diar Bakerly, Paul Dark, Christopher E. Brightling, Seema Brij, CIRCO, Timothy Felton, Angela Simpson, John R. Grainger, Tracy Hussell, Joanne E. Konkel, and Madhvi Menon**

## **Supplemental Information**

### **Alterations in T and B cell function persist in convalescent COVID-19 patients**

Halima A. Shuwa, Tovah N. Shaw, Sean B. Knight, Kelly Wemyss, Flora A. McClure, Laurence Pearmain, Ian Prise, Christopher Jagger, David. J. Morgan, Saba Khan, Oliver Brand, Elizabeth R. Mann, Andrew Ustianowski, Nawar Diar Bakerly, Paul Dark, Christopher E. Brightling, Seema Brij, CIRCO, Timothy Felton, Angela Simpson, John R. Grainger, Tracy Hussell, Joanne E. Konkel, Madhvi Menon.

**Supplemental Table 1. Clinical characteristics of acute COVID-19 patients, Related to Figures 1-4. Data are median (IQR)<sup>m</sup>, where<sup>m</sup> is the number of missing data points, n (%) or n/N (%), where N is the total number with available data. PE, pulmonary embolism, AKI, Acute kidney injury. <sup>a</sup> Admission observations.**

### Acute Patients

|                                                              | <b>Overall (58)</b>            | <b>Mild (22)</b>              | <b>Moderate (23)</b>        | <b>Severe (13)</b>             |
|--------------------------------------------------------------|--------------------------------|-------------------------------|-----------------------------|--------------------------------|
| Age                                                          | 58.5 (49.5-71)                 | 58 (45-71)                    | 58 (50-66.5)                | 67 (55-74)                     |
| <b>Gender</b>                                                |                                |                               |                             |                                |
| Male                                                         | 36/58 (62.1%)                  | 13/22 (59.1%)                 | 13/23 (56.5%)               | 10/13 (77%)                    |
| Female                                                       | 22/58 (37.9%)                  | 9/22 (40.9%)                  | 10/23 (43.5%)               | 3/13 (23%)                     |
| BMI                                                          | 28.5 (25.2-30.6) <sup>14</sup> | 27.8 (23.2-33.1) <sup>8</sup> | 29 (26.8-30.3) <sup>3</sup> | 27.6 (25.4-30.2) <sup>3</sup>  |
| Day of admission recruited                                   | 2 (2-3)                        | 3 (2-4.75)                    | 2 (2-3)                     | 2 (2-3)                        |
| <b>Medical History</b>                                       |                                |                               |                             |                                |
| Diabetes                                                     | 13/58 (22.41%)                 | 6/22 (27.27%)                 | 2/23 (8.7%)                 | 5/13 (38.46%)                  |
| Ischaemic Heart Disease                                      | 8/58 (13.79%)                  | 3/22 (13.64%)                 | 2/23 (8.7%)                 | 3/13 (23.08%)                  |
| Hypertension                                                 | 20/58 (34.48%)                 | 6/22 (27.27%)                 | 9/23 (39.13%)               | 5/13 (38.46%)                  |
| COPD                                                         | 11/58 (18.97%)                 | 5/22 (22.73%)                 | 4/23 (17.39%)               | 2/13 (15.38%)                  |
| Asthma                                                       | 9/58 (15.52%)                  | 4/22 (18.18%)                 | 4/23 (17.39%)               | 1/13 (7.69%)                   |
| Malignancy                                                   | 5/58 (8.6%)                    | 0/22 (0%)                     | 2/23 (8.7%)                 | 3/13 (23%)                     |
| <b>Differential counts on admission (x 10<sup>9</sup>/L)</b> |                                |                               |                             |                                |
| Total white cell count                                       | 7.1 (6-10) <sup>9</sup>        | 6.85 (5.55-8.42) <sup>4</sup> | 7.3 (6.3-10) <sup>2</sup>   | 7.25 (6.55-10.02) <sup>3</sup> |
| Lymphocytes                                                  | 1 (0.82-1.5) <sup>9</sup>      | 1.2 (0.92-1.77) <sup>4</sup>  | 0.9 (0.8-1.5) <sup>2</sup>  | 0.9 (0.82-0.98) <sup>3</sup>   |
| Neutrophils                                                  | 5.3 (4.4-8) <sup>9</sup>       | 5.15 (3.8-7.05) <sup>4</sup>  | 5.5 (4.7-7.7) <sup>2</sup>  | 6.25 (4.82-8.62) <sup>3</sup>  |
| Monocytes                                                    | 0.4 (0.2-0.6) <sup>9</sup>     | 0.25 (0.2-0.73) <sup>4</sup>  | 0.5 (0.4-0.7) <sup>2</sup>  | 0.35 (0.3-0.57) <sup>3</sup>   |
| <b>Other inpatient investigations</b>                        |                                |                               |                             |                                |
| Positive SARS CoV2 PCR                                       | 49/58 (84%)                    | 18/22 (81%)                   | 20/23 (87%)                 | 11/13 (85%)                    |
| Highest CRP (mg/L)                                           | 144 (83.9-226)                 | 99 (35-176)                   | 131 (86.5-195.6)            | 256 (198-283)                  |
| <b>Chest Imaging</b>                                         |                                |                               |                             |                                |
| Bilateral opacification                                      | 49/56 (87.5%)                  | 14/20 (70%)                   | 22/23 (95.7%)               | 13/13 (100%)                   |
| Unilateral opacification                                     | 3/56 (5.4%)                    | 2/20 (10%)                    | 1/23 (4.3%)                 | 0/13 (0%)                      |
| Clear                                                        | 4/56 (7.1%)                    | 4/20 (20%)                    | 0/23 (0%)                   | 0/13 (0%)                      |
| <b>Outcome</b>                                               |                                |                               |                             |                                |
| Length of stay (days)                                        | 6 (4-11.3) <sup>2</sup>        | 5.5 (3.3-9.2)                 | 6 (4-10) <sup>2</sup>       | 10 (6-13)                      |
| Mortality                                                    | 9/58 (15.5%)                   | 1/22 (4.5%)                   | 0/23 (0%)                   | 8/13 (61.5%)                   |

**Supplemental Table 2. Clinical characteristics of convalescent COVID-19 patients**  
 Related to Figures 1-4. Data are median (IQR)<sup>m</sup>, where<sup>m</sup> is the number of missing data points, n (%) or n/N (%), where N is the total number with available data. PE, pulmonary embolism, AKI, Acute kidney injury. <sup>a</sup> Admission observations.

| <b>Convalescent Patients</b>                                            |                                  |                                 |                                  |                                  |
|-------------------------------------------------------------------------|----------------------------------|---------------------------------|----------------------------------|----------------------------------|
|                                                                         | <b>Overall (83)</b>              | <b>Mild (15)</b>                | <b>Moderate (27)</b>             | <b>Severe (41)</b>               |
| Age (years)                                                             | 60 (51 - 66.5)                   | 51 (45 - 59.54)                 | 60 (51.5 - 71)                   | 60 (55.63 - 66)                  |
| <b>Gender</b>                                                           |                                  |                                 |                                  |                                  |
| Male                                                                    | 51/83 (61.4%)                    | 10/15 (66.7%)                   | 14/27 (51.9%)                    | 27/41 (65.9%)                    |
| Female                                                                  | 32/83 (38.6%)                    | 5/15 (33.3%)                    | 13/27 (48.1%)                    | 14/41 (34.1%)                    |
| BMI                                                                     | 31 (28.7 - 34.7) <sup>31</sup>   | 34.8 (31.9 - 38.4) <sup>5</sup> | 30.9 (28.8 - 34.6) <sup>13</sup> | 29.6 (28.5 - 33.1) <sup>13</sup> |
| <b>Medical History</b>                                                  |                                  |                                 |                                  |                                  |
| Diabetes                                                                | 21/83 (25.3%)                    | 4/15 (26.67%)                   | 9/27 (33.33%)                    | 8/41 (19.51%)                    |
| Ischaemic heart disease                                                 | 17/83 (20.48%)                   | 2/15 (13.33%)                   | 12/27 (44.44%)                   | 3/41 (7.32%)                     |
| Hypertension                                                            | 32/83 (38.55%)                   | 3/15 (20%)                      | 13/27 (48.15%)                   | 16/41 (39.02%)                   |
| COPD                                                                    | 14/83 (16.87%)                   | 3/15 (20%)                      | 9/27 (33.33%)                    | 2/41 (4.88%)                     |
| Asthma                                                                  | 30/83 (36.14%)                   | 7/15 (46.67%)                   | 9/27 (33.33%)                    | 14/41 (34.15%)                   |
| Malignancy                                                              | 5/83 (6.02%)                     | 0/15 (0%)                       | 3/27 (11.1%)                     | 2/41 (4.9%)                      |
| <b>ACUTE ADMISSION</b>                                                  |                                  |                                 |                                  |                                  |
| <b>Differential blood counts on acute admission (x10<sup>9</sup>/L)</b> |                                  |                                 |                                  |                                  |
| Total white cell count                                                  | 7.3 (5.77 - 10.1) <sup>11</sup>  | 6.1 (4.8 - 7.5) <sup>2</sup>    | 6.65 (5.63 - 9.55) <sup>7</sup>  | 8.7 (6.8 - 11.35) <sup>2</sup>   |
| Lymphocytes                                                             | 0.89 (0.7 - 1.21) <sup>11</sup>  | 1.1 (0.86 - 1.63) <sup>2</sup>  | 0.98 (0.73 - 1.42) <sup>7</sup>  | 0.8 (0.62 - 0.95) <sup>2</sup>   |
| Neutrophils                                                             | 5.99 (4.13 - 8.75) <sup>11</sup> | 4.04 (3.7 - 5.7) <sup>2</sup>   | 4.81 (4.04 - 7.68) <sup>7</sup>  | 7.03 (5.34 - 10.2) <sup>2</sup>  |
| Monocytes                                                               | 0.4 (0.27 - 0.56) <sup>11</sup>  | 0.27 (0.23 - 0.55) <sup>2</sup> | 0.48 (0.3 - 0.6) <sup>7</sup>    | 0.4 (0.3 - 0.52) <sup>2</sup>    |
| <b>Other inpatient investigations</b>                                   |                                  |                                 |                                  |                                  |
| Positive SARS CoV2 test                                                 | 78/83 (94%)                      | 15/15 (100%)                    | 25/27 (92.6%)                    | 38/41 (92.7%)                    |
| Highest CRP (mg/L)                                                      | 135 (66 - 245.5) <sup>3</sup>    | 50 (26.5 - 88.5)                | 113 (70 - 151.5) <sup>1</sup>    | 256 (131 - 330) <sup>2</sup>     |
| <b>Chest imaging</b>                                                    |                                  |                                 |                                  |                                  |
| Bilateral opacification                                                 | 59/64 (92.1%)                    | 7/9 (77.8%)                     | 21/23 (91.3%)                    | 31/32 (96.9%)                    |
| Unilateral opacification                                                | 4/64 (6.3%)                      | 1/9 (11.1%)                     | 2/23 (8.7%)                      | 1/32 (3.1%)                      |
| Clear                                                                   | 1/64 (1.6%)                      | 1/9 (11.1%)                     | 0/23 (0%)                        | 0/32 (0%)                        |
| <b>Outcome</b>                                                          |                                  |                                 |                                  |                                  |
| Length of stay (days)                                                   | 11 (5.5 - 21.5)                  | 2 (1 - 5.5)                     | 7 (4.5 - 13)                     | 20 (13 - 39)                     |
| <b>CONVALESCENCE</b>                                                    |                                  |                                 |                                  |                                  |
| Admission to follow up (days)                                           | 158 (116.5 - 184.5)              | 174 (140.5 - 185)               | 140 (105 - 171.5)                | 155 (126 - 192)                  |
| Discharge to follow up (days)                                           | 131 (90 - 178)                   | 169 (138.5 - 181.5)             | 125 (95.5 - 165)                 | 117 (87 - 180)                   |
| <b>Symptoms and investigations at follow up</b>                         |                                  |                                 |                                  |                                  |
| Dyspnoea                                                                | 38/82 (46.34%)                   | 6/15 (40%)                      | 16/27 (59.26%)                   | 16/40 (40%)                      |
| Resolved CXR                                                            | 55/83 (66.3%)                    | 12/15 (80%)                     | 19/27 (70.4%)                    | 24/41 (58.5%)                    |
| Persistent CXR features                                                 | 28/83 (33.7%)                    | 3/15 (20%)                      | 8/27 (29.6%)                     | 17/41 (41.5%)                    |

**Supplemental Table 3. Patient categorisation Information** Related to Figures 1-4. Criteria for patient stratification. NIV, non-invasive ventilation; CPAP, continuous positive airway pressure; ICU, intensive care.

| <b>Severity Score</b>  | <b>Criteria</b>                                                                                                                                                                                                                                                            |
|------------------------|----------------------------------------------------------------------------------------------------------------------------------------------------------------------------------------------------------------------------------------------------------------------------|
| <b><u>Mild</u></b>     | <ul style="list-style-type: none"> <li>- &lt;3l or 28% supplemental oxygen required to maintain oxygen saturations.</li> <li>- Managed in a ward based environment.</li> </ul>                                                                                             |
| <b><u>Moderate</u></b> | <ul style="list-style-type: none"> <li>- Breathless</li> <li>- &lt;10l or &lt;60% supplemental oxygen required to maintain oxygen saturations.</li> <li>- Managed in a ward based environment.</li> <li>- Chronic NIV or CPAP (home use) or acute NIV for COPD.</li> </ul> |
| <b><u>Severe</u></b>   | <p>Any of:</p> <ul style="list-style-type: none"> <li>- &gt;10l or 60% supplemental oxygen required to maintain oxygen saturations.</li> <li>- Use of acute NIV (not for COPD)</li> <li>- Managed in ICU/invasive ventilation.</li> </ul>                                  |

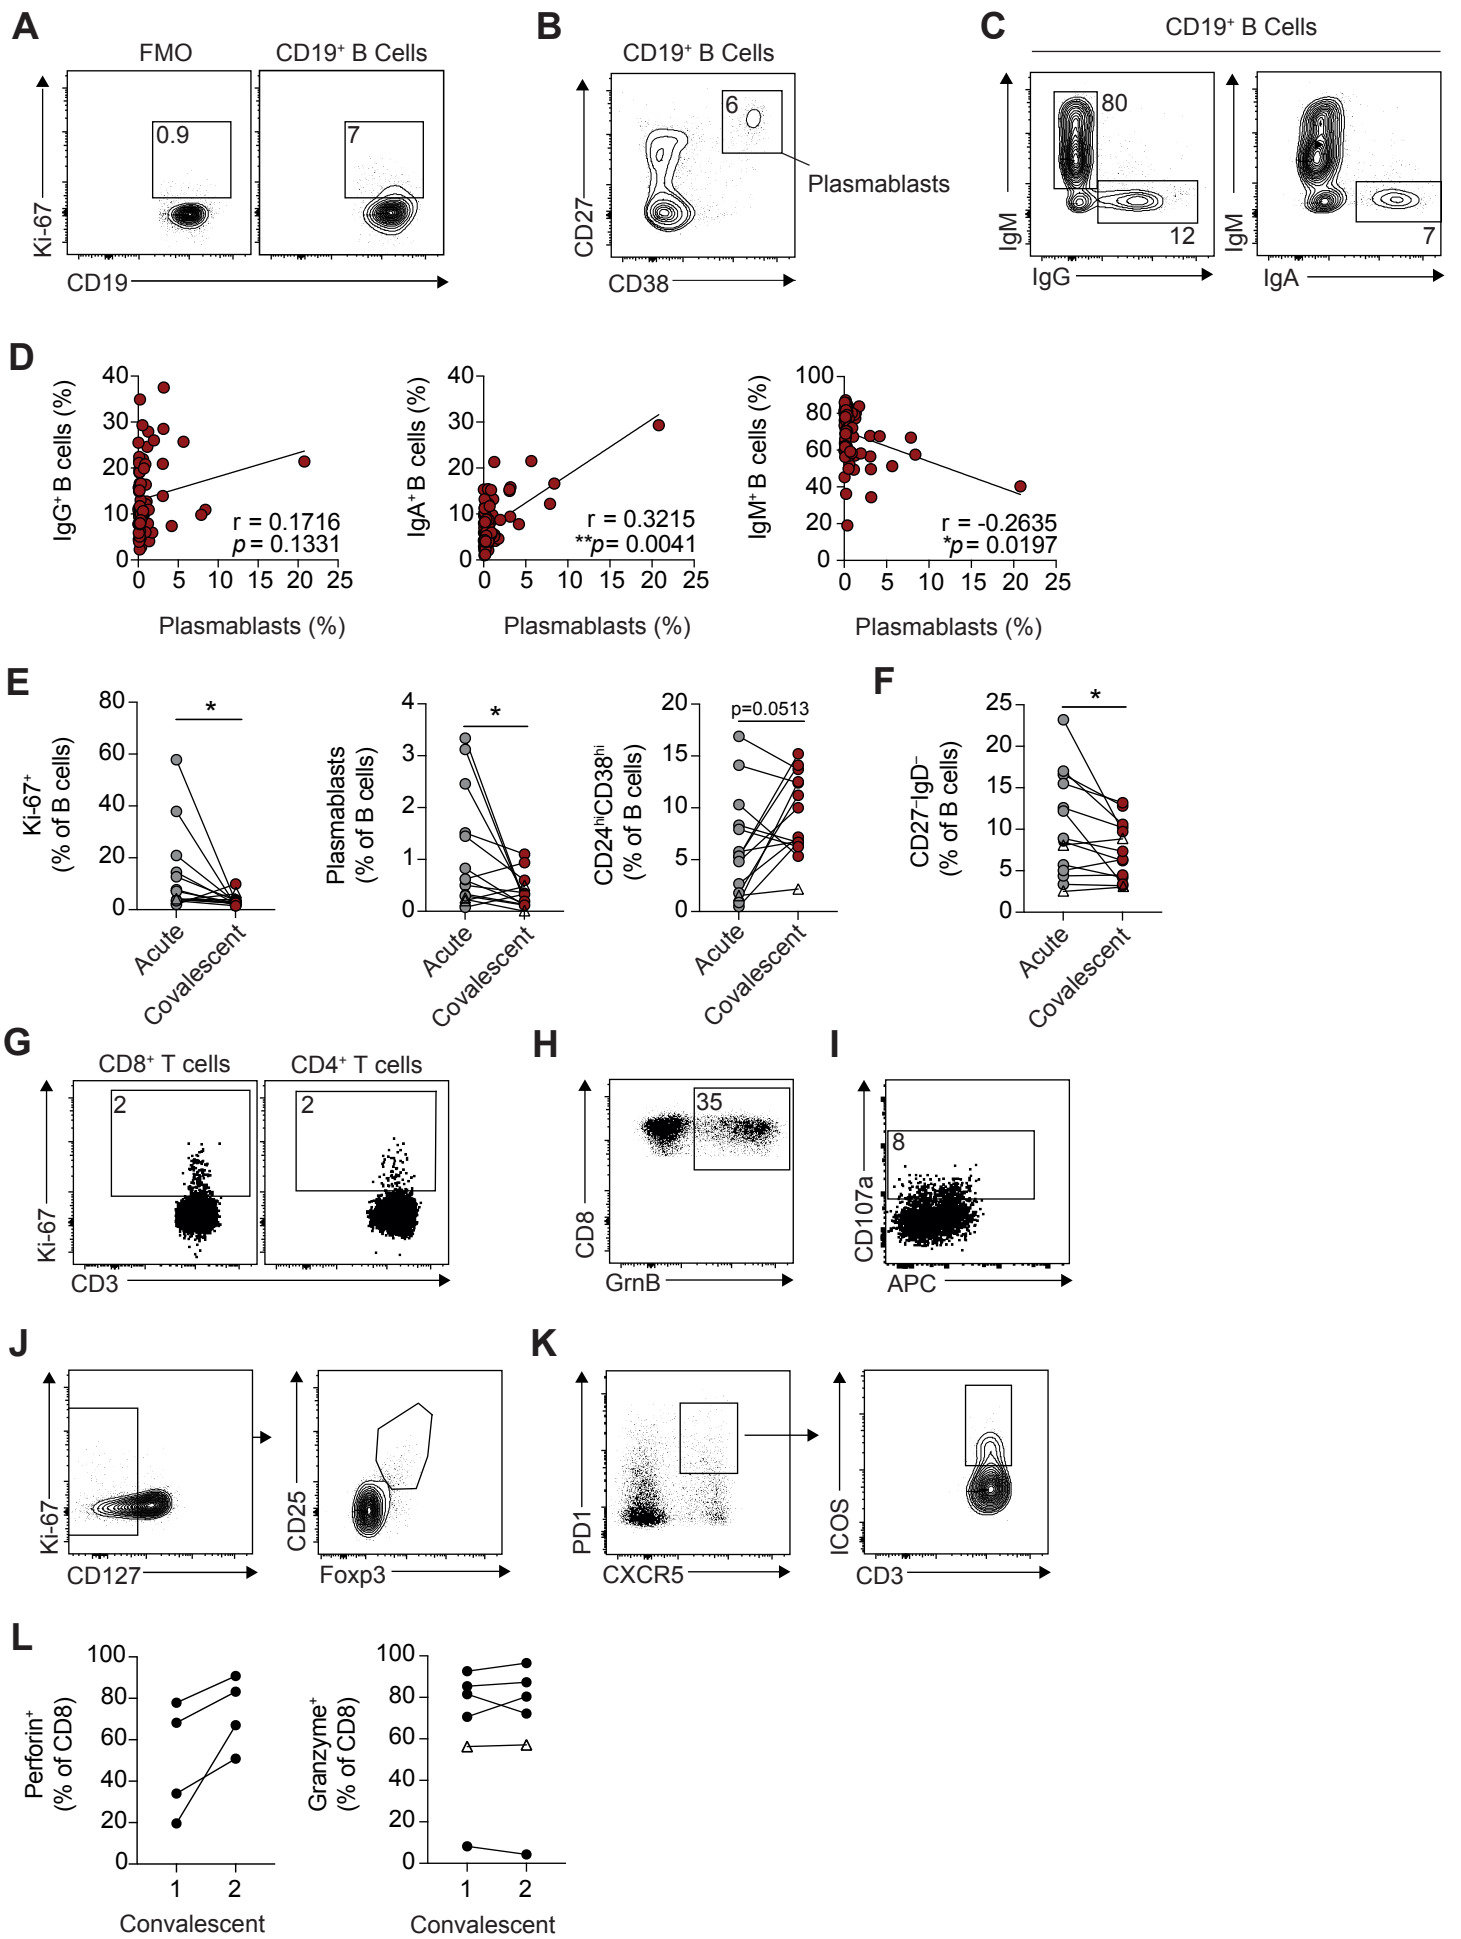

**Supplemental Figure 1. T and B cell subsets in hospitalized COVID-19 patients**, Related to Figures 1 and 2. **(A)** Representative FACS plots showing Ki-67 staining on CD19<sup>+</sup> B cells. **(B)** Representative FACS plots showing the gating strategy for CD27<sup>hi</sup>CD38<sup>hi</sup> plasmablasts. **(C)** Representative FACS plots gated on CD19<sup>+</sup> B cells staining positive for IgG, IgM or IgA. **(D)** Graphs showing correlation between plasmablasts and IgG<sup>+</sup> (left), IgA<sup>+</sup> (middle) or IgM<sup>+</sup> (right) B cell frequencies in convalescent COVID-19 patients (n=78). **(E,F)** Graphs track frequencies of **(E)** Ki67<sup>+</sup> B cells, plasmablasts, transitional (CD24<sup>hi</sup>CD38<sup>hi</sup>) B cells, and **(F)** CD27<sup>-</sup>IgD<sup>-</sup> B cells in the same COVID-19 patient at acute (grey circles) and convalescent (maroon circles) time-points (n=14). **(G)** Representative FACS plots showing Ki-67 staining on CD4<sup>+</sup> and CD8<sup>+</sup> T cells. **(H,I)** Representative FACS plots showing CD8<sup>+</sup> T cells staining positive for **(H)** GranzymeB and **(I)** CD107a. **(J)** Representative FACS plots gated on CD3<sup>+</sup>CD4<sup>+</sup>CD127<sup>lo/neg</sup> T cells staining positive for CD25 and foxp3. **(K)** Representative FACS plots showing gating to identify Tfh cells (CD3<sup>+</sup>CD4<sup>+</sup>PD-1<sup>+</sup>CXCR5<sup>+</sup> ICOS<sup>+</sup>). **(L)** Graphs track frequencies of CD8<sup>+</sup> T cells which are perforin<sup>+</sup> and granzymeB<sup>+</sup> in the same COVID-19 patient at convalescent time-points pre (1) and post (2) 6 months since hospital discharge (n=4-6). In all graphs, triangles represent SARS-CoV-2 PCR-negative patients.

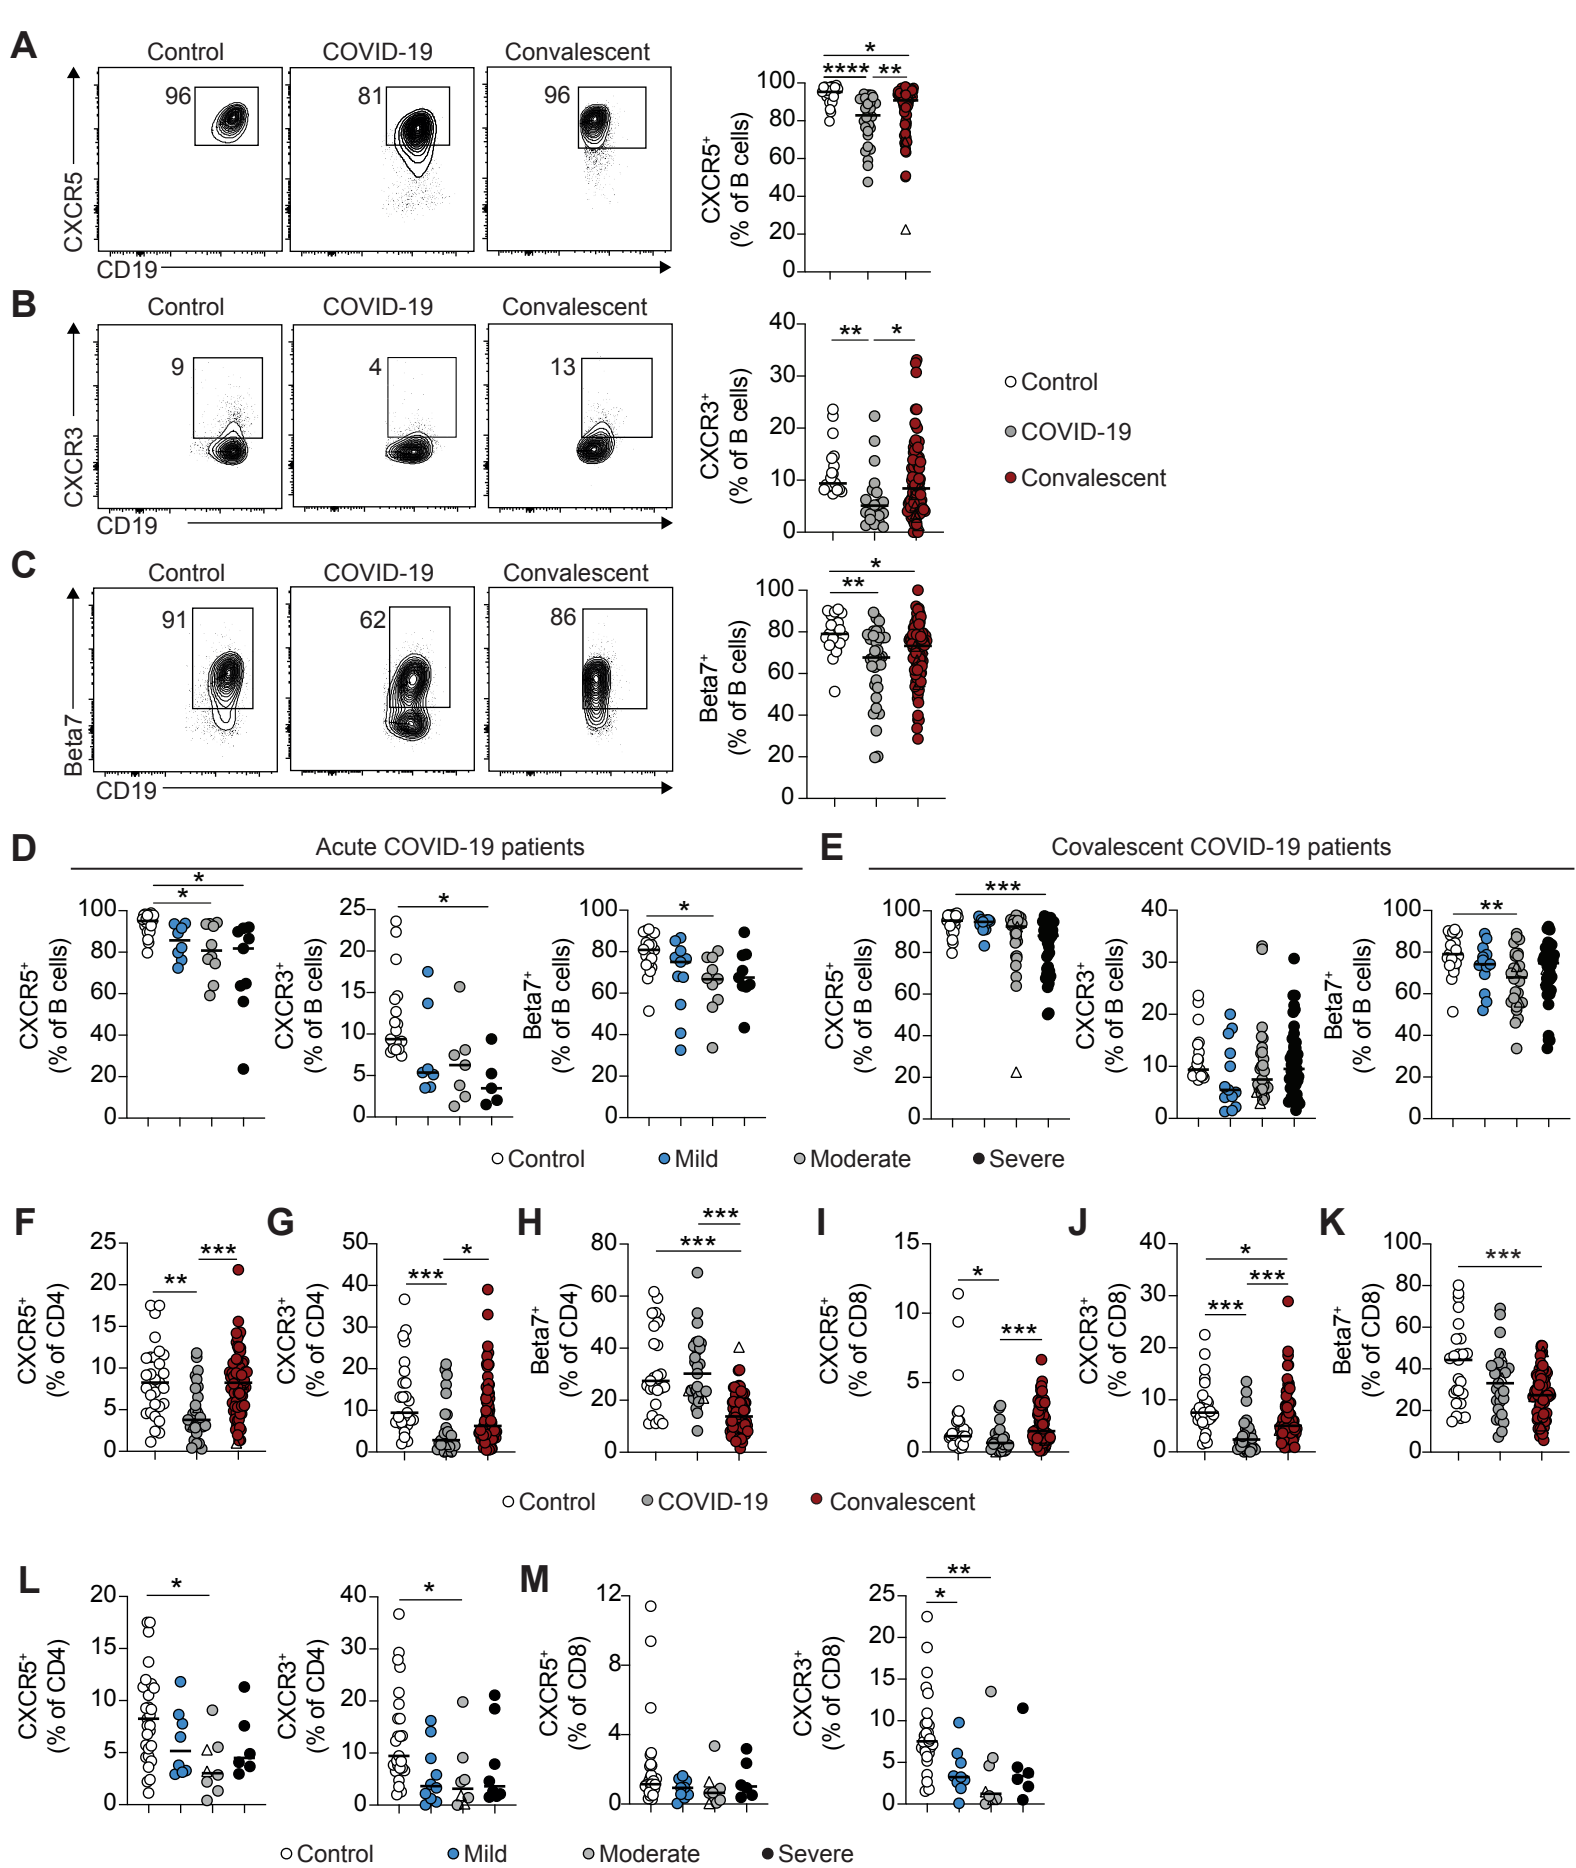

Supplementary Figure 2



**Supplemental Figure 2. Altered expression of migratory markers in acute but not convalescent COVID-19 patients,** Related to Figures 1 and 2. **(A-C)** Representative flow cytometry plots and graphs showing frequencies of B cells expressing **(A)** CXCR5, **(B)** CXCR3 and **(C)**  $\beta$ 7 in healthy individuals (n=19-21), acute (n=21-34) and convalescent (n=81) COVID-19 patients. **(D)** Graphs showing frequencies of B cells expressing CXCR3, CXCR5 and  $\beta$ 7 in healthy individuals (n=19) and acute COVID-19 patients with mild (n=7-11), moderate (n=7-10) and severe (n=5-9) disease. **(E)** Graphs showing frequencies of B cells staining positive for CXCR3, CXCR5 and  $\beta$ 7 in healthy individuals (n=19-21) and convalescent COVID-19 patients which initially presented with mild (n=13), moderate (n=26) and severe (n=41) disease. **(F-H)** Graphs showing frequencies of CD4<sup>+</sup> cells positive for **(F)** CXCR5, **(G)** CXCR3 and **(H)**  $\beta$ 7 in healthy individuals (n=25-29), acute (n=26-27) and convalescent (n=80-83) COVID-19 patients. **(I-K)** Graphs showing frequencies of CD8<sup>+</sup> cells positive for **(I)** CXCR5, **(J)** CXCR3 and **(K)**  $\beta$ 7 in healthy individuals (n=25-29), acute (n=27-28) and convalescent (n=80-81) COVID-19 patients. **(L,M)** Graphs showing frequencies of **(L)** CD4<sup>+</sup> and **(M)** CD8<sup>+</sup> T cells staining positive for CXCR3 and CXCR5 in healthy individuals (n=25-29) and acute COVID-19 patients with mild (n=8-10), moderate (n=8) and severe (n=6-8) disease. Graphs show individual patient data, with the bar representing median values. In all graphs, triangles represent SARS-CoV-2 PCR-negative patients. \*p<0.05, \*\*p<0.01, \*\*\*p<0.001, \*\*\*\*p<0.0001, one-way ANOVA with Holm-Sidak post-hoc testing (A-E, K and L (CXCR5)) or Kruskal-Wallis test with Dunn's post-hoc testing (F-J, L(CXCR3), M) for multiple comparisons.

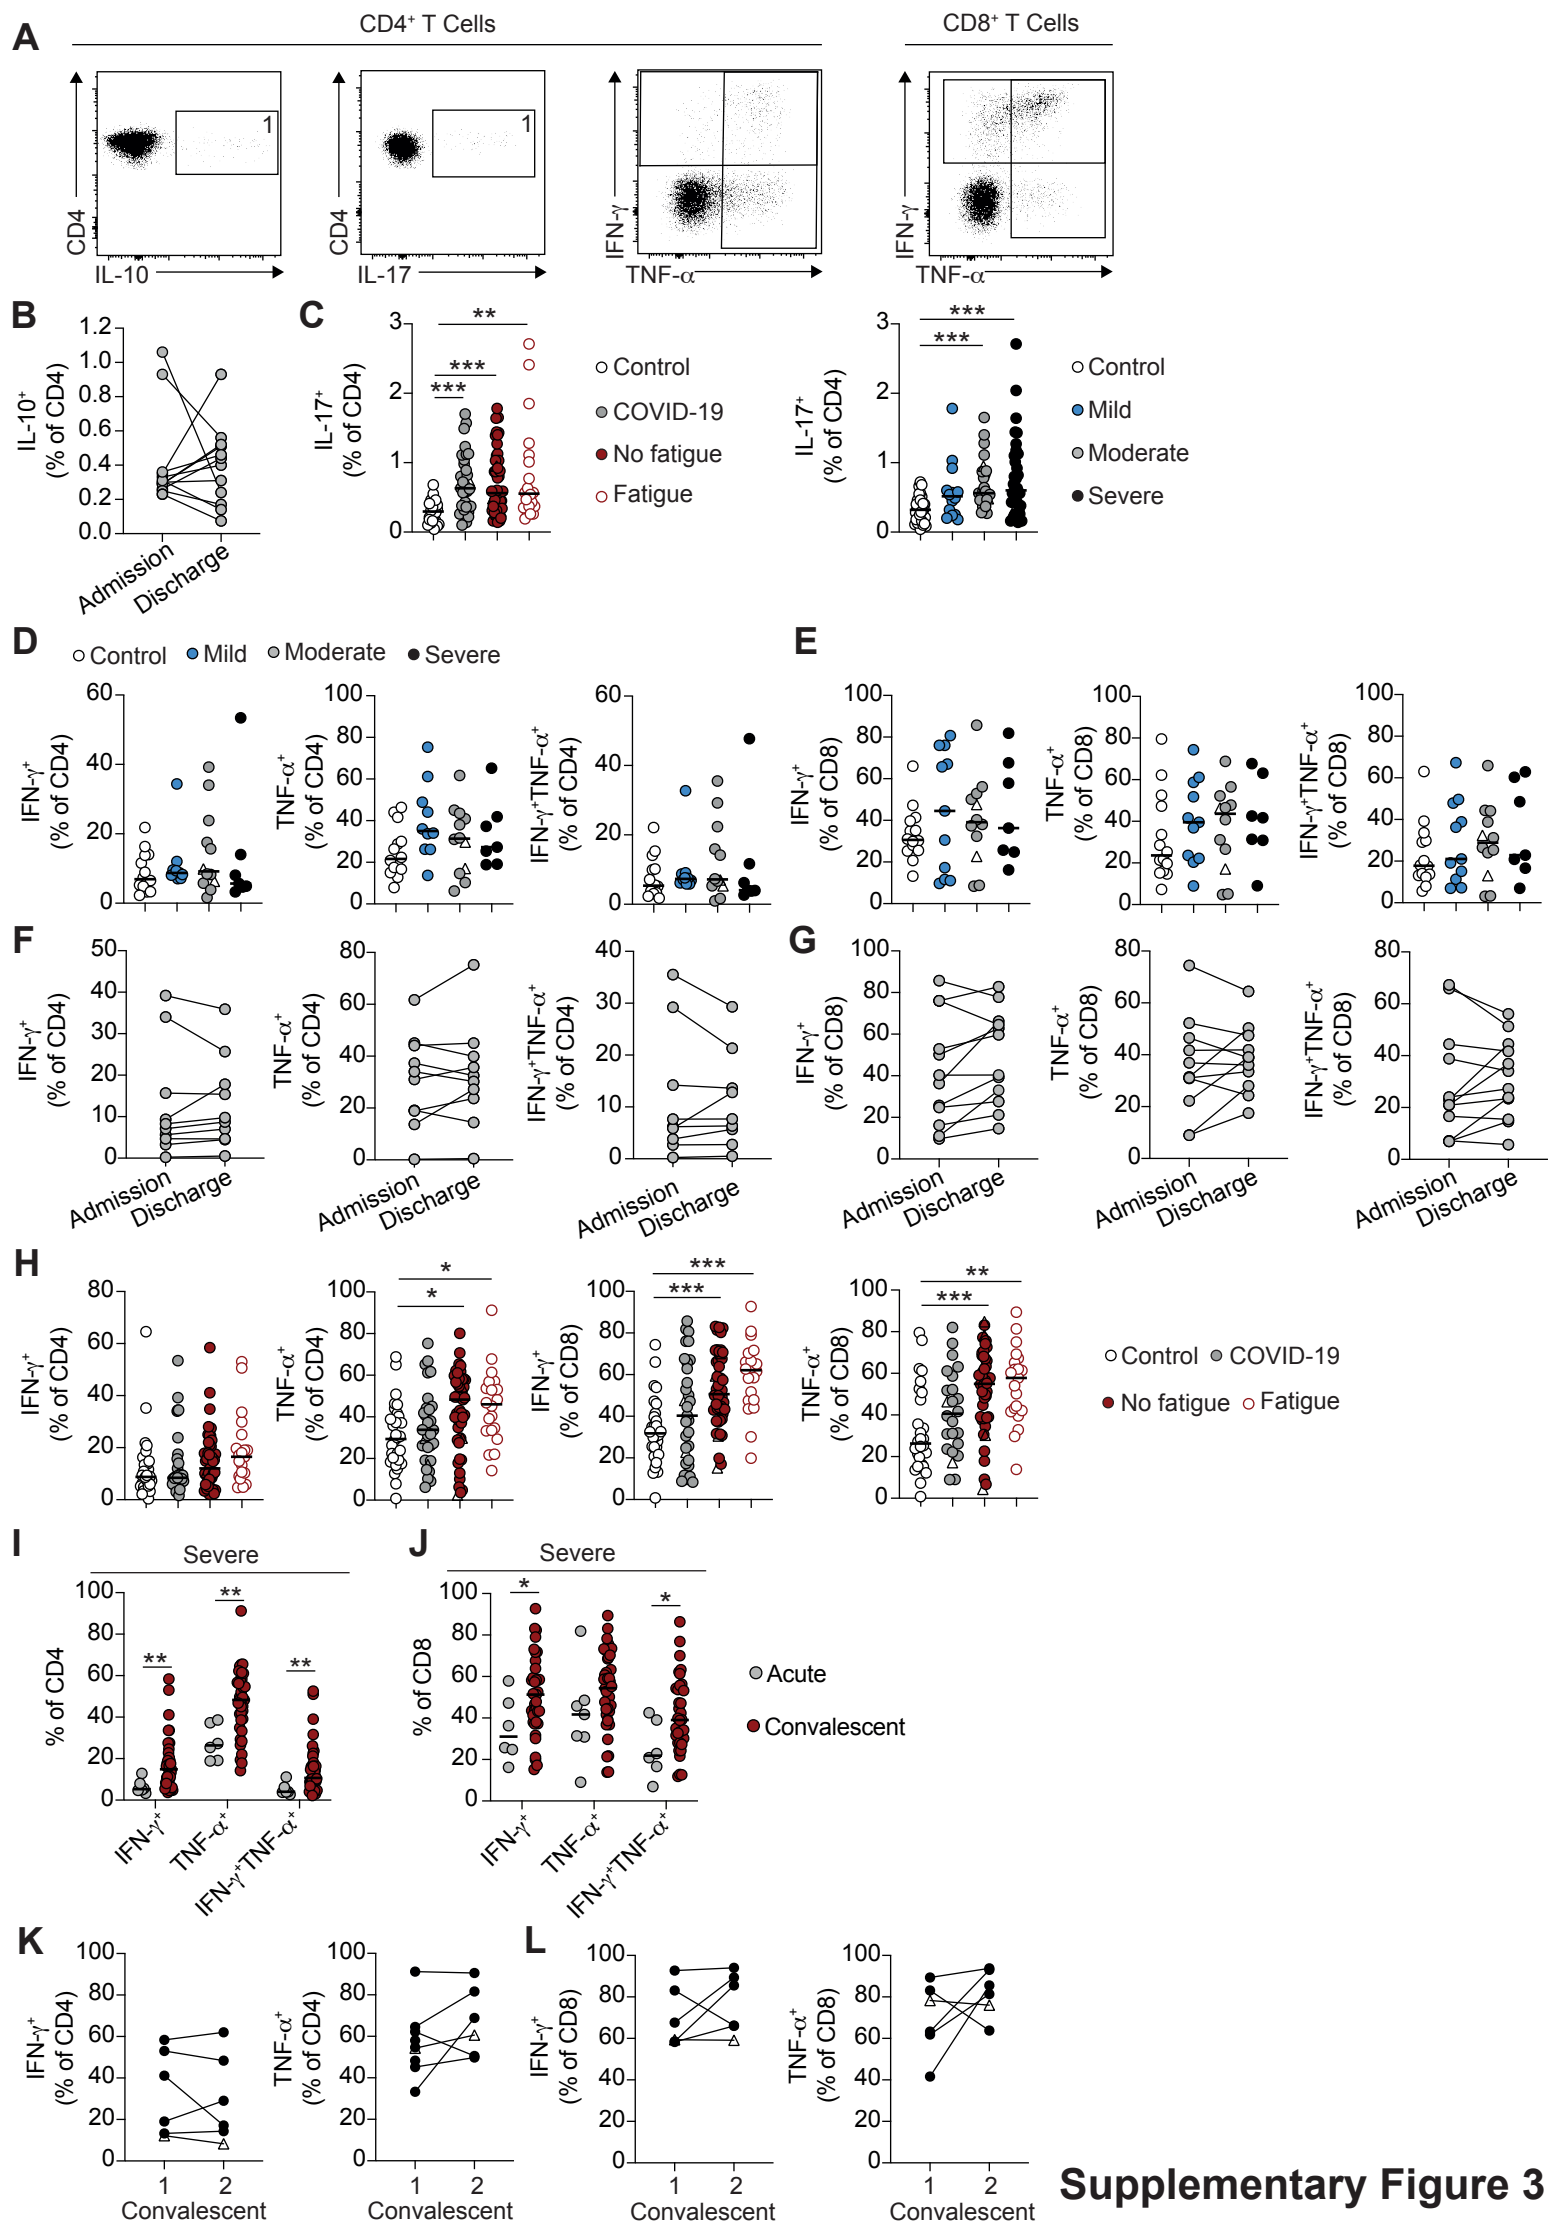

**Supplemental Figure 3. Long-lasting changes in type-I cytokine production T cells in convalescent COVID-19 patients**, Related to Figure 3. **(A)** Representative FACS plots showing example staining for cytokine<sup>+</sup> CD4<sup>+</sup> and CD8<sup>+</sup> T cells. **(B)** Graph shows frequency of IL-10<sup>+</sup>CD4<sup>+</sup> T cells following 3 hour stimulation with PMA and ionomycin in acute COVID-19 patients at the first and last time points of hospitalization. **(C)** Graph show frequencies of IL-17<sup>+</sup>CD4<sup>+</sup> T cells following 3 hour stimulation with PMA and ionomycin in healthy individuals (n=22-30), acute COVID-19 patients (n=31) and convalescent COVID-19 patients stratified by fatigue reporting (not reporting (n=50) and reporting (n=20) enhanced fatigue) and mild (n=14), moderate (n=27) and severe (n=36) acute disease severity. **(D, E)** Graphs show frequencies of **(D)** CD4<sup>+</sup> and **(E)** CD8<sup>+</sup> T cells which stain positive for IFN $\gamma$  and TNF $\alpha$  following 3 hour stimulation with PMA and ionomycin in healthy individuals (n=14) and acute COVID-19 patients with mild (n=10-11), moderate (n=12) and severe (n=7) disease. **(F, G)** Graphs show frequencies of **(F)** CD4<sup>+</sup> and **(G)** CD8<sup>+</sup> T cells that stain positive for IFN $\gamma$  and TNF $\alpha$  following 3 hour stimulation with PMA and ionomycin in acute COVID-19 patients at the first and last time points of hospitalization. **(H)** Graphs show frequencies of CD4<sup>+</sup> and CD8<sup>+</sup> T cells which stain positive for IFN $\gamma$  and TNF $\alpha$  following 3 hour stimulation with PMA and ionomycin in healthy individuals (n=28-30), acute COVID-19 patients (n=24-33) and convalescent COVID-19 patients not reporting (n=44-49) and reporting (n=20-21) enhanced fatigue. **(I, J)** Graphs show frequencies of CD4<sup>+</sup> and CD8<sup>+</sup> T cells which stain positive for IFN $\gamma$  and TNF $\alpha$  in all severe COVID-19 patients at acute (grey) and convalescent (maroon) time-points. **(K, L)** Graphs track frequencies of CD4<sup>+</sup> and CD8<sup>+</sup> T cells which stain positive for IFN $\gamma$  and TNF $\alpha$  following 3 hour stimulation with PMA and ionomycin in the same COVID-19 patient at convalescent time-points pre (1) and post (2) 6 months since hospital discharge (n=4-6). Graphs show individual patient data, with the bar representing median values. In all graphs, triangles represent SARS-CoV-2 PCR-negative patients. \*p<0.05, \*\*p<0.01, \*\*\*p<0.001, one-way ANOVA with Kruskal-Wallis test with Dunn's post-hoc testing for multiple comparisons (except for graphs showing CD4<sup>+</sup>TNF $\alpha$ <sup>+</sup> and CD8<sup>+</sup>TNF $\alpha$ <sup>+</sup> T cells in D and E where One-way ANOVA with Holm-Sidak post-hoc test was employed).

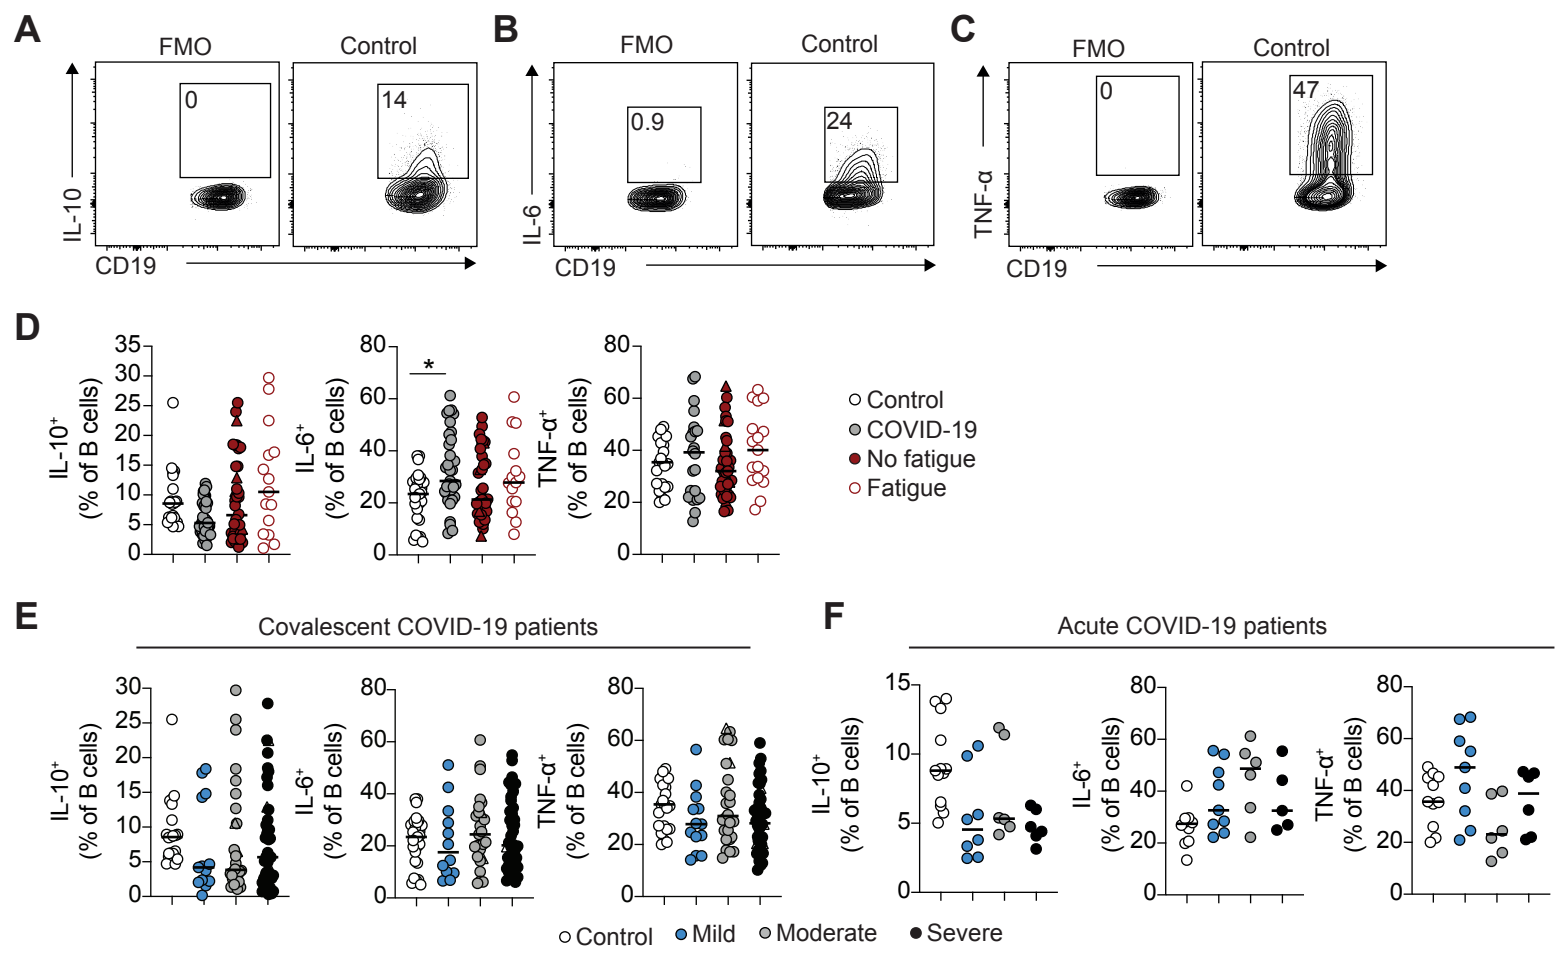

**Supplemental Figure 4. Cytokine production by B cells from acute and convalescent COVID-19 patients**, Related to Figure 3. **(A-C)** Representative flow cytometry plots showing gating strategy of CD19<sup>+</sup> B cells positive for IL-10, IL-6 and TNF $\alpha$  following 48 hour stimulation with CpGB. **(D)** Graphs show frequencies of CD19<sup>+</sup> B cells staining positive IL-10, IL-6 and TNF $\alpha$  following 48 hour stimulation with CpGC in healthy individuals (n=22-27), acute COVID-19 patients (n=22-37) and convalescent COVID-19 patients not reporting (n=36-38) and reporting (n=15-17) enhanced fatigue. **(E)** Graphs show frequencies CD19<sup>+</sup> B cells staining positive for IL-10, IL-6 and TNF $\alpha$  in healthy individuals (n=22-23), and convalescent COVID-19 patients which initially presented with mild (n=12-13), moderate (n=25-26) and severe (n=41) disease. **(F)** Graphs show frequencies CD19<sup>+</sup> B cells staining positive for IL-10, IL-6 and TNF $\alpha$  in healthy individuals (n=11-13), and acute COVID-19 patients with mild (n=8-9), moderate (n=6) and severe (n=6) disease. Graphs show individual patient data, with the bar representing median values. \*p<0.05, one-way ANOVA with Kruskal-Wallis test with Dunn's post-hoc testing for multiple comparisons.
